# Supplementary material for: Thermal relaxation in combination with fiberglass confined interpenetrating networks: a key calcination process for as-desired free standing metal oxide nanofibrous membranes
Source: Royal Society of Chemistry journal article supplement (doi:10.1039/c6ra15086a), 2016-01-01
Supplement: c6ra15086a1.pdf [file c6ra15086a1.pdf]

## Supporting information

### **Thermal Relaxation in Combination with Fiber Glass Confined Interpenetrating Network: A Key Calcination Process for As-Desired Free Standing Metal Oxide Nanofibrous Membrane**

Nakarin Subjalearndee<sup>a</sup> and Varol Intasanta<sup>a\*</sup>

<sup>a</sup> Nano Functional Textile Laboratory, National Nanotechnology Center, National Science and Technology Development Agency, 111 Phahonyothin Road, Klong Nueng, Klong Luang, Pathumthani, 12120, Thailand. E-mail: [varol@nanotec.or.th](mailto:varol@nanotec.or.th)

## Supporting Information

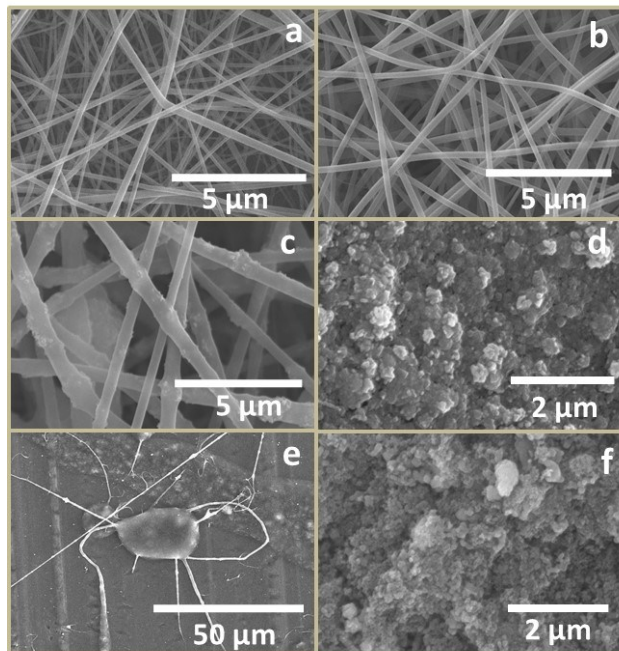

**Figure S1.** (a) SEM images of electrospun nanofibers from the solution precursor containing AMT, (b) AMT and ZAH, (c) AMT, ZAH, and P25 nanoparticles and AMT, (e) ZAH and TIP in a solvent mixture of water and ethanol. Calcination of sample (c) at (d) 500  $^{\circ}\text{C}$  and sample (e) at (f) 500  $^{\circ}\text{C}$ .

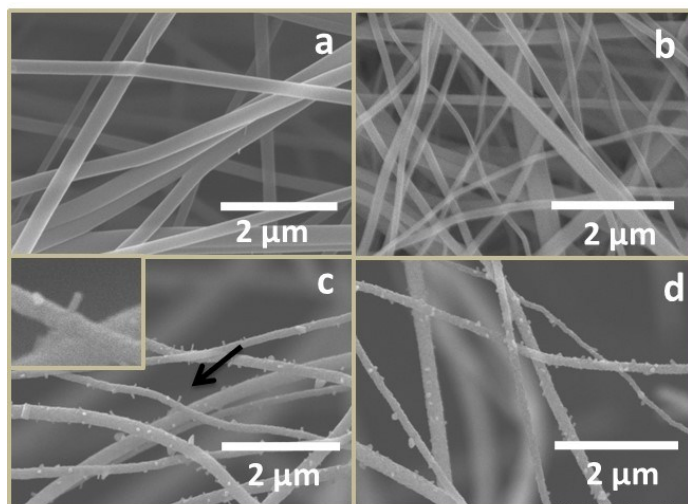

**Figure S2.** (a) SEM images of electrospinning solution precursor containing AMT, ZAH, and TIP in a solvent mixture of ethanol and DMF. Calcination of sample (a) at (b) 500 °C, (c) 600 °C and (d) 700 °C .

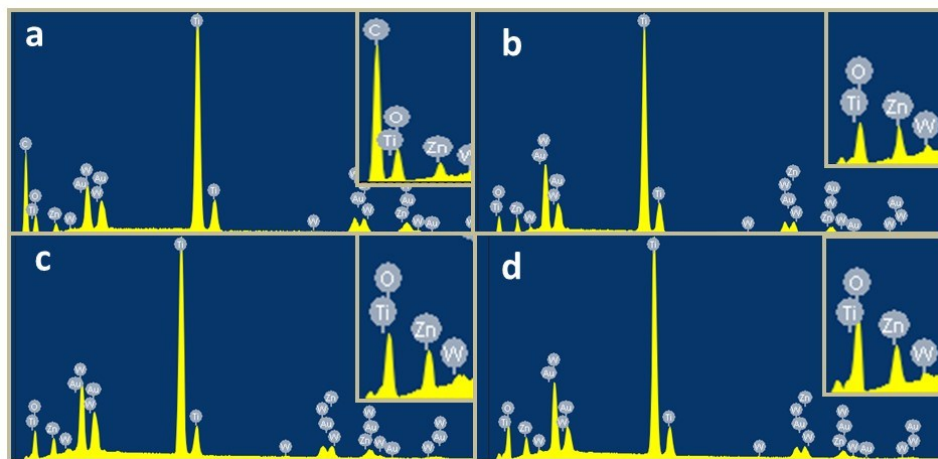

**Figure S3.** (a) SEM-EDX of the nanofibers before calcination showing carbon content and after calcination at (b) 500 °C, (c) 600 °C, (d) 700 °C.

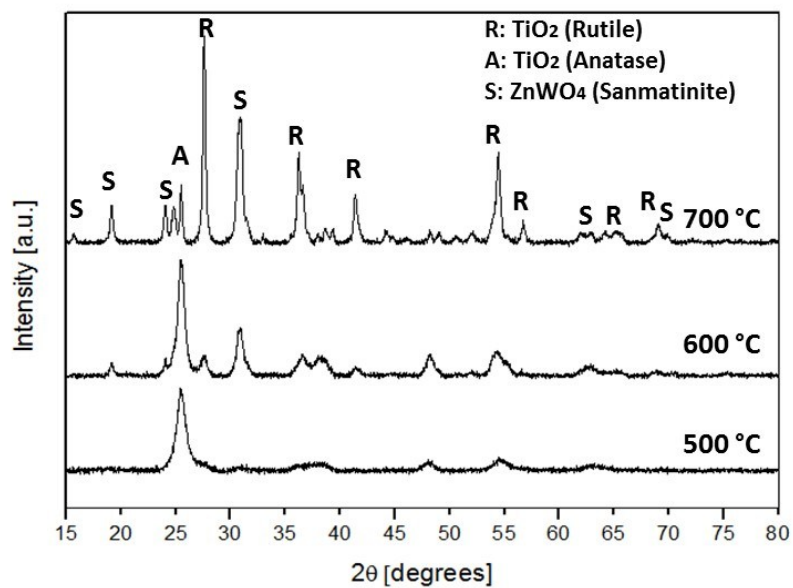

**Figure S4.** XRD patterns of ZnWO<sub>4</sub>/mixed-phased TiO<sub>2</sub> nanofibers at different calcination temperatures.

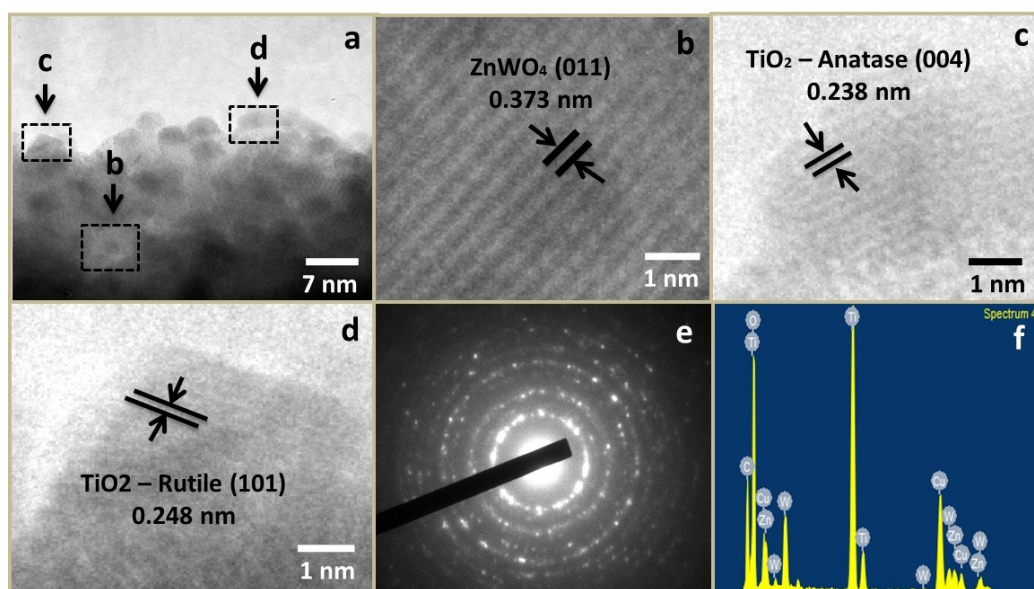

**Figure S5.** (a) TEM, (b-d) HRTEM, (e) SAED, and (f) TEM-EDX images of ZnWO<sub>4</sub>/mixed-phased TiO<sub>2</sub> nanofibers after calcination at 600 °C.

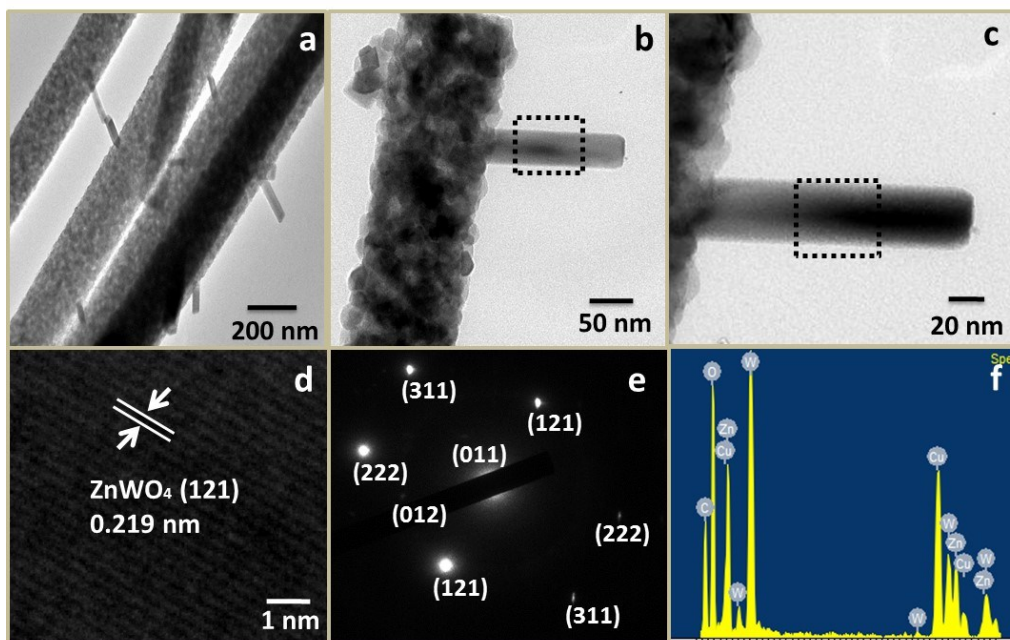

**Figure S6.** (a) TEM, (b-d) HRTEM, (e) SAED, and (f) TEM-EDX images of grown ZnWO<sub>4</sub> nanorod on ZnWO<sub>4</sub>/mixed-phased TiO<sub>2</sub> nanofibers after calcination at 600 °C.

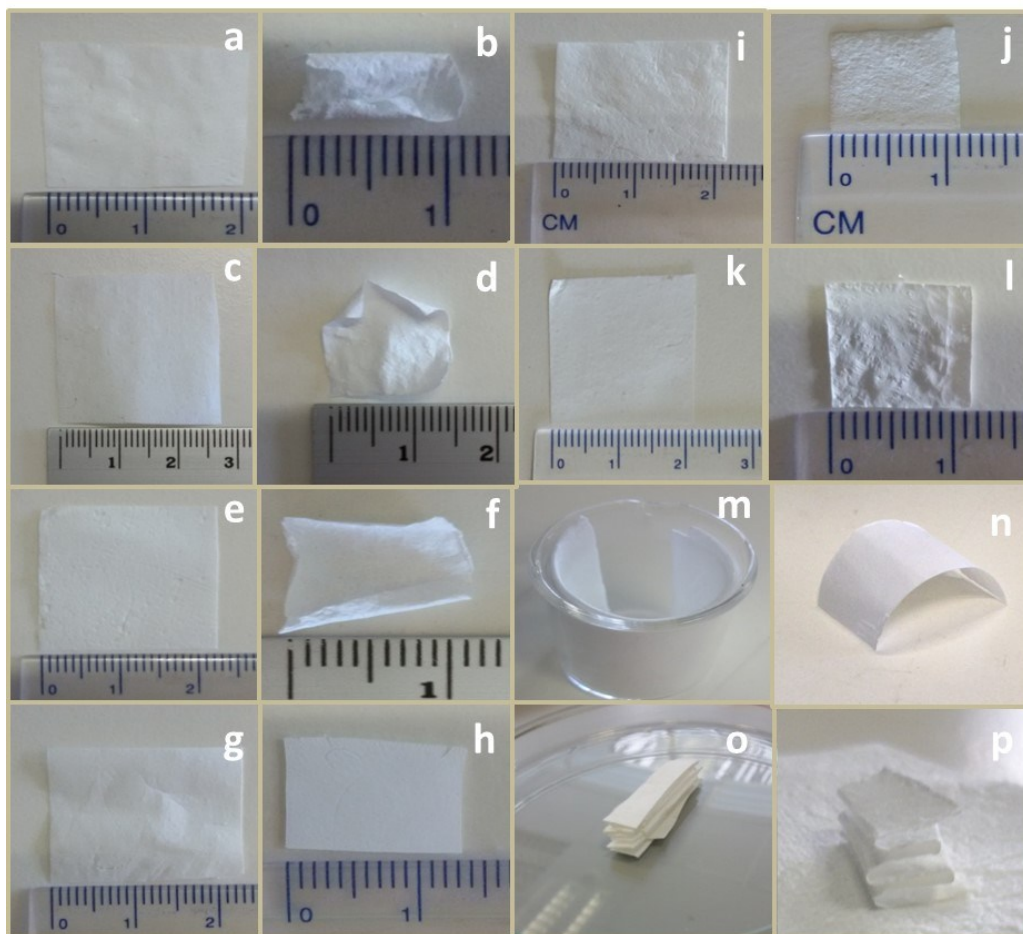

**Figure S7** (a, c, e, g, i, k, m and o) Pictures of electrospun nanofibers before calcination. (b) Sample in (a) after calcination at 600 °C. (d) Sample in (c) after calcination by 100-AC processes. (f) Sample in (e) after 200-AC processes. (h) Sample in (g) after 100-AC processes while sandwiched between two fiber glass fabrics. (j) Sample in (i) after 200-AC processes while sandwiched between fiber glass fabrics. (l) Sample in (k) after 200-AC processes while sandwiched between glass slides. (n) Sample in (m) after 200-AC processes with controlled bending shape by fiber glass fabrics in a beaker. (p) Sample in (o) after 200-AC processes with controlled folding shape by fiber glass fabrics.

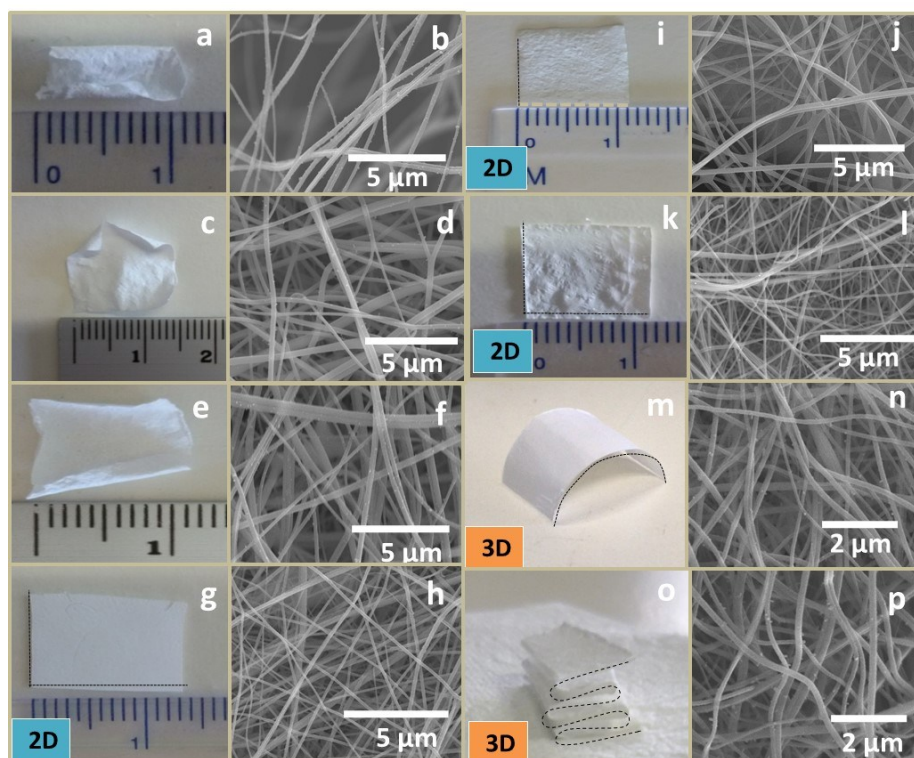

**Figure S8** (a, c, e, g, i, k, m and o) Pictures of nanofibrous membranes after various thermal treatment. (b, d, f, h, j, l, n and p) SEM images of each membrane.

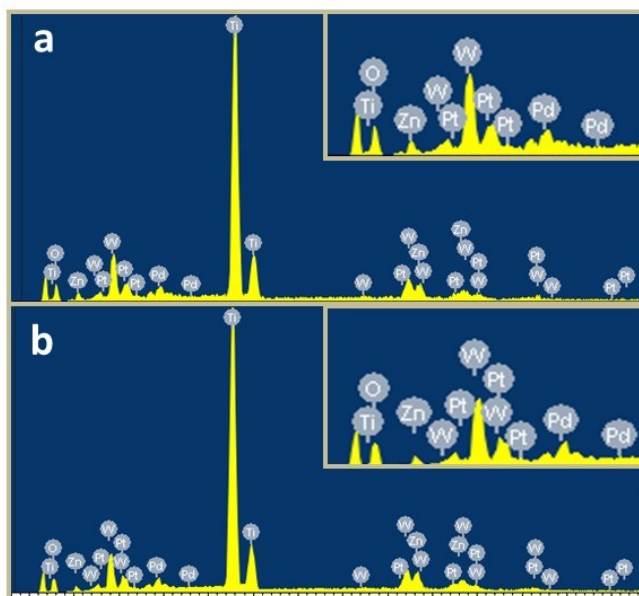

**Figure S9** SEM-EDX of Pd/Pt-TiO<sub>2</sub>-ZnWO<sub>4</sub> nanofibers by (a) visible and (b) UV light photodeposition method.

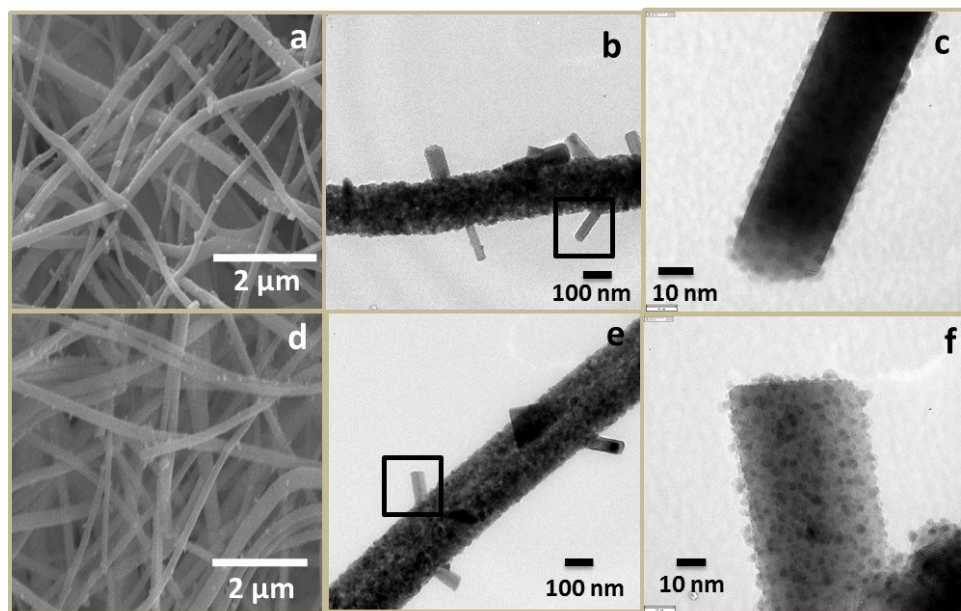

**Figure S10.** (a-c) SEM, TEM and HRTEM images of photodeposited Pt and Pd on ZnWO<sub>4</sub>/mixed-phase TiO<sub>2</sub> nanofibers under visible light and (d-f) UV light.

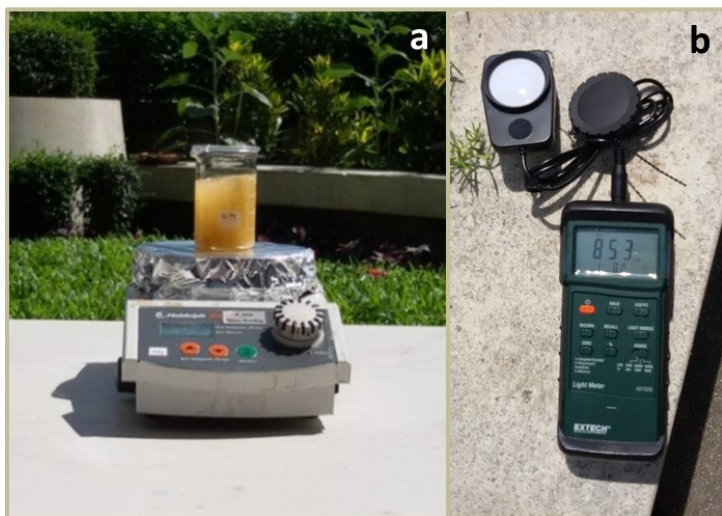

**Figure S11** (a) Photodeposition activity under natural sunlight and (b) sunlight intensity measurement by Lux meter.
